# Supplementary material
Source: ML conference proceedings conference paper supplement (https://openreview.net/forum?id=EaRoPGzxRkO)
Supplement: supplementary_material [file attachment]

## Appendix

The appendices are organized as follows. Formal proofs of the results stated in the main text are presented in Section A. In Section B, we describe the algorithm to recover the maximal hedge formed for a certain query (Def. 5), which is used as a subroutine of Algorithm 1. A generalization of Assumption 1 is discussed in Section C. Section D provides further details of the heuristic algorithms discussed in the main text. Further evaluations and experimental conditions for our proposed algorithms are presented in Section E.

Table 2: Table of notations

| Symbol                     | Description                                             |
|----------------------------|---------------------------------------------------------|
| $V^{\mathcal{G}}$          | Vertices of $\mathcal{G}$                               |
| $E_b^{\mathcal{G}}$        | The set of bidirected edges of $\mathcal{G}$            |
| $E_d^{\mathcal{G}}$        | The set of directed edges of $\mathcal{G}$              |
| $Anc_{\mathcal{G}}(X)$     | Ancestors of $X$ in $\mathcal{G}$                       |
| $\mathcal{M}(\mathcal{G})$ | The set of the all compatible models with $\mathcal{G}$ |
| $p_e$                      | Probability of edge $e$                                 |
| $w_e$                      | Weight of edge $e$                                      |
| $P_X(Y)$                   | Causal effect of $X$ on $Y$                             |

### A Formal Proofs

We begin with presenting the proofs of Proposition 1 and Lemma 1. Proofs of Theorem 1 and Proposition 2 appear at the end of Sections A.1 and A.2, respectively.

**Proposition 1.** *For any causal query  $P_X(Y)$  and ADMG  $\mathcal{G}$ , if  $\mathcal{F}$  is a valid identification formula for  $P_X(Y)$  in  $\mathcal{G}$  (Def. 2), then  $\mathcal{F}$  is a valid identification formula for  $P_X(Y)$  in any  $\mathcal{G}' \subseteq \mathcal{G}$ .*

*Proof.* Let  $\mathcal{H} \subseteq \mathcal{G}$  be an arbitrary edge-induced subgraph of  $\mathcal{G}$ . Let  $\mathcal{F}$  be an identification formula for  $P_X(Y)$  in  $\mathcal{G}$ , i.e., for any model  $M$  that induces  $\mathcal{G}$ ,

$$P_X^M(Y) = \mathcal{F}(P^M(V^{\mathcal{G}})). \quad (5)$$

By definition,  $P_X(Y)$  is identifiable in  $\mathcal{G}$ . As a result, there exists an identification formula such as  $\mathcal{F}'$  that can be derived for  $P_X(Y)$  in  $\mathcal{G}$ , using a sequence of do calculus rules and basic probability manipulations. Note that this means for any model  $M$  that induces  $\mathcal{G}$ ,

$$P_X^M(Y) = \mathcal{F}'(P^M(V^{\mathcal{G}})). \quad (6)$$

Note that an immediate corollary of Equations 5 and 6 is that for any model  $M$  that induces  $\mathcal{G}$ ,

$$\mathcal{F}(P^M(V^{\mathcal{G}})) = \mathcal{F}'(P^M(V^{\mathcal{G}})). \quad (7)$$

Now, we first show that this sequence of actions (combination of do calculus rules and probability manipulations) is valid in  $\mathcal{H}$ . Note that the basic probability manipulations are graph-independent. It only suffices to show that any applied do calculus rule w.r.t.  $\mathcal{G}$  can also be applied w.r.t.  $\mathcal{H}$ . The validity conditions of all three do calculus rules are based on certain d-separations. As a result, it suffices to show that if a d-separation relation is valid in  $\mathcal{G}$ , it is also valid in  $\mathcal{H}$ . To do so, it suffices to show that if all paths between  $Z_1$  and  $Z_2$  are blocked in  $\mathcal{G}$  given  $W$ , they are blocked in  $\mathcal{H}$  too, for arbitrary disjoint sets of vertices  $Z_1, Z_2, W \subseteq V^{\mathcal{G}}$ . Take an arbitrary path,  $p$ , between  $Z_1$  and  $Z_2$  in  $\mathcal{H}$ . Since  $\mathcal{H} \subseteq \mathcal{G}$ , this path exists in  $\mathcal{G}$ . Since  $Z_1$  and  $Z_2$  are d-separated given  $W$  in  $\mathcal{G}$ , the path  $p$  is blocked by  $W$ . As a result, any path between  $Z_1$  and  $Z_2$  in  $\mathcal{H}$  is blocked by  $W$ . Therefore, any do-calculus rule applied in  $\mathcal{G}$ , can also be applied in  $\mathcal{H}$ . Hence,  $\mathcal{F}'$  is a valid identification formula for  $P_X(Y)$ . That is, for any model  $M$  that induces  $\mathcal{H}$ ,

$$P_X^M(Y) = \mathcal{F}'(P^M(V^{\mathcal{H}})). \quad (8)$$

Now note that any model  $M$  that induces  $\mathcal{H}$ , i.e., is compatible with  $\mathcal{H}$ , is also compatible with  $\mathcal{G}$ . Also,  $V^{\mathcal{G}} = V^{\mathcal{H}}$ . As a result, from Equations 7 and 8, we know that for any model  $M$  that induces  $\mathcal{H}$ ,

$$P_X^M(Y) = \mathcal{F}(P^M(V^{\mathcal{H}})).$$

By definition,  $\mathcal{F}$  is a valid identification formula for  $P_X(Y)$  in  $\mathcal{H}$ . □

464 **Lemma 1.** Under Assumption 1, Problem 1 is equivalent to the edge ID problem with the edge  
 465 weights chosen to be the log propensity ratios, i.e.,  $w_e = \max\{0, \log(\frac{p_e}{1-p_e})\}$ ,  $\forall e \in \mathcal{G}$ . Moreover,  
 466 Problem 2 is equivalent to the edge ID problem with the choice of weights  $w_e = -\log(1 - p_e)$ ,  
 467  $\forall e \in \mathcal{G}$ . That is, an instance of Problems 1 and 2 can be reduced to an instance of the edge ID  
 468 problem in polynomial time, and vice versa.

469 *Proof. Problem 1.* First consider an arbitrary graph  $\mathcal{G}_1 \in [\mathcal{G}]_{Id(Q[Y])}$  such that  $\mathcal{G}_1$  has an edge  $e$  with  
 470  $p_e < 1/2$ . Let  $\mathcal{G}_2$  denote the graph  $\mathcal{G}_1$  after removing  $e$ . Proposition 1 implies that  $\mathcal{G}_2 \in [\mathcal{G}]_{Id(Q[Y])}$ .  
 471 According to Equation 1, we have  $P(\mathcal{G}_2) = \frac{1-p_e}{p_e} P(\mathcal{G}_1) > P(\mathcal{G}_1)$  (since  $p_e < 1/2$ ). As a result,  
 472 the solution  $\mathcal{G}^*$  to Problem 1 (Eq. 2) has no edges with probability less than  $1/2$ . We can therefore  
 473 rewrite Problem 1 as:

$$\mathcal{G}^* := \arg \max_{\substack{\mathcal{G}_s \subseteq \mathcal{G}, \\ \mathcal{G}_s \in [\mathcal{G}]_{Id(Q[Y])}}} P(\mathcal{G}_s) = \arg \max_{\substack{\mathcal{G}_s \subseteq \mathcal{G}, \\ \mathcal{G}_s \in [\mathcal{G}]_{Id(Q[Y])}}} P(\mathcal{G}_s) \quad \text{s.t.} \quad \forall e \in \mathcal{G}_s : p_e \geq \frac{1}{2}.$$

474 Or equivalently, we can always assume that we start with a graph  $\mathcal{G}$  that has no edges with probability  
 475 less than  $1/2$ , as otherwise we can remove all of those edges and the problem does not change. This  
 476 indeed is equivalent to choosing weight (cost) 0 for those edges in the equivalent edge ID problem.  
 477 Now assuming that the edges have probability at least  $1/2$ ,

$$\begin{aligned} \mathcal{G}^* &= \arg \max_{\substack{\mathcal{G}_s \subseteq \mathcal{G}, \\ \mathcal{G}_s \in [\mathcal{G}]_{Id(Q[Y])}}} P(\mathcal{G}_s) \\ &= \arg \max_{\substack{\mathcal{G}_s \subseteq \mathcal{G}, \\ \mathcal{G}_s \in [\mathcal{G}]_{Id(Q[Y])}}} \log(P(\mathcal{G}_s)) \\ &= \arg \max_{\substack{\mathcal{G}_s \subseteq \mathcal{G}, \\ \mathcal{G}_s \in [\mathcal{G}]_{Id(Q[Y])}}} \log\left(\prod_{e \in \mathcal{G}_s} p_e \prod_{e \notin \mathcal{G}_s} (1 - p_e)\right) \\ &= \arg \max_{\substack{\mathcal{G}_s \subseteq \mathcal{G}, \\ \mathcal{G}_s \in [\mathcal{G}]_{Id(Q[Y])}}} \sum_{e \in \mathcal{G}_s} \log(p_e) + \sum_{e \notin \mathcal{G}_s} \log(1 - p_e) \\ &= \arg \max_{\substack{\mathcal{G}_s \subseteq \mathcal{G}, \\ \mathcal{G}_s \in [\mathcal{G}]_{Id(Q[Y])}}} \sum_{e \in \mathcal{G}_s} \log(p_e) + \sum_{e \notin \mathcal{G}_s} \log(1 - p_e) + \sum_{e \in \mathcal{G}_s} \log(1 - p_e) - \sum_{e \notin \mathcal{G}_s} \log(1 - p_e) \end{aligned}$$

478 Since  $\sum_{e \notin \mathcal{G}_s} \log(1 - p_e) + \sum_{e \in \mathcal{G}_s} \log(1 - p_e)$  is a constant value that does not depend on  $\mathcal{G}_s$ , it  
 479 can be ignored in the maximization and we have:

$$\begin{aligned} \mathcal{G}^* &= \arg \max_{\substack{\mathcal{G}_s \subseteq \mathcal{G}, \\ \mathcal{G}_s \in [\mathcal{G}]_{Id(Q[Y])}}} \sum_{e \in \mathcal{G}_s} \log(p_e) - \sum_{e \in \mathcal{G}_s} \log(1 - p_e) \\ &= \arg \max_{\substack{\mathcal{G}_s \subseteq \mathcal{G}, \\ \mathcal{G}_s \in [\mathcal{G}]_{Id(Q[Y])}}} \sum_{e \in \mathcal{G}_s} \log\left(\frac{p_e}{1 - p_e}\right) \\ &= \arg \min_{\substack{\mathcal{G}_s \subseteq \mathcal{G}, \\ \mathcal{G}_s \in [\mathcal{G}]_{Id(Q[Y])}}} \sum_{e \notin \mathcal{G}_s} \log\left(\frac{p_e}{1 - p_e}\right). \end{aligned}$$

480 From the formulation above, it is clear that if we assign the weight  $w_e = \log(\frac{p_e}{1-p_e})$  to each edge  
 481  $e \in E^{\mathcal{G}}$ , we will have an instance of the edge ID problem. Note that for edges with probability higher  
 482 than  $1/2$ ,  $\log(\frac{p_e}{1-p_e}) \geq 0$ , and this assignment of edge weights satisfies the positivity requirement.  
 483 For the opposite direction, note that the procedure explained above is reversible by the choice of  
 484 probabilities  $p_e = \frac{\exp(w_e)}{1 + \exp(w_e)}$ , which is a value between  $1/2$  and  $1$ .

485 *Problem 2.* First note that under Assumption 1, for any graph  $\mathcal{G}_s$ ,

$$\sum_{\hat{\mathcal{G}} \subseteq \mathcal{G}_s} P(\hat{\mathcal{G}}) = \prod_{e \notin \mathcal{G}_s} (1 - p_e) \left[ \sum_{\hat{E} \subseteq E^{\mathcal{G}_s}} \prod_{e \in \hat{E}} p_e \prod_{e \notin \hat{E}} (1 - p_e) \right] = \prod_{e \notin \mathcal{G}_s} (1 - p_e).$$

486 This is because the inner summation goes over all the possible subsets of  $E^{\mathcal{G}_s}$ , and the summation  
 487 adds up to 1. Therefore, we can rewrite Problem 2 (Eq. 3) as

$$\begin{aligned}
 \mathcal{H}^* &= \arg \max_{\substack{\mathcal{G}_s \subseteq \mathcal{G}, \\ \mathcal{G}_s \in [\mathcal{G}]_{Id(Q[Y])}}} \sum_{\hat{\mathcal{G}} \subseteq \mathcal{G}_s} P(\hat{\mathcal{G}}) \\
 &= \arg \max_{\substack{\mathcal{G}_s \subseteq \mathcal{G}, \\ \mathcal{G}_s \in [\mathcal{G}]_{Id(Q[Y])}}} \prod_{e \notin \mathcal{G}_s} (1 - p_e) \\
 &= \arg \max_{\substack{\mathcal{G}_s \subseteq \mathcal{G}, \\ \mathcal{G}_s \in [\mathcal{G}]_{Id(Q[Y])}}} \log \left( \prod_{e \notin \mathcal{G}_s} (1 - p_e) \right) \\
 &= \arg \max_{\substack{\mathcal{G}_s \subseteq \mathcal{G}, \\ \mathcal{G}_s \in [\mathcal{G}]_{Id(Q[Y])}}} \sum_{e \notin \mathcal{G}_s} \log(1 - p_e) \\
 &= \arg \min_{\substack{\mathcal{G}_s \subseteq \mathcal{G}, \\ \mathcal{G}_s \in [\mathcal{G}]_{Id(Q[Y])}}} \sum_{e \notin \mathcal{G}_s} -\log(1 - p_e).
 \end{aligned}$$

488 With the same reasoning as before, assigning the weights  $w_e = -\log(1 - p_e)$  to each edge  $e \in E^{\mathcal{G}}$ ,  
 489 we end up with an instance of the edge ID problem. Note that again  $0 \leq -\log(1 - p_e) \leq \infty$ .  
 490 It is noteworthy that this procedure is also reversible with the choice of edge probabilities  $p_e =$   
 491  $1 - \exp(-w_e)$ , which reduces the edge ID problem to an instance of Problem 2. Again note that  
 492  $0 \leq 1 - \exp(-w_e) \leq 1$  for any non-negative  $w_e$ .  $\square$

### 493 A.1 Reduction from MCIP to edge ID

494 **Theorem 1.** *The edge ID problem is NP-hard.*

495 To prove Theorem 1, we first present a polynomial-time reduction from MCIP to the edge ID problem.  
 496 It has been shown that the minimum vertex cover problem can be reduced to MCIP in polynomial  
 497 time [1]. Combining the two reductions, we show that there exists a polynomial-time reduction from  
 498 the minimum vertex cover problem to the edge ID problem. Since the minimum vertex cover problem  
 499 is known to be NP-hard [11], it follows that the edge ID problem is also NP-hard.

500 We propose the following reduction from MCIP to the edge ID problem. Assume we want to solve  
 501 MCIP given ADMG  $\mathcal{G} = (V^{\mathcal{G}}, E_d^{\mathcal{G}}, E_b^{\mathcal{G}})$ , query  $Q[Y]$ , and the intervention costs  $C(v)$  for  $v \in V^{\mathcal{G}}$ .  
 502 We construct a graph, denoted by  $\mathcal{H} = \mathcal{T}_1(\mathcal{G}, Y)$ , through the following steps.

- 503 a. For every vertex  $x \in V^{\mathcal{G}} \setminus Y$ , add two vertices  $x^1, x^2$  to  $V^{\mathcal{H}}$ .
- 504 b. For any bidirected edge  $\{x, z\} \in E_b^{\mathcal{G}}$  where  $x \in V^{\mathcal{G}} \setminus Y$  and  $z \in V^{\mathcal{G}}$ , add the bidirected edge  
 505  $\{x^2, z^2\}$  to  $E_b^{\mathcal{H}}$ .
- 506 c. For any directed edge  $(x, z) \in E_d^{\mathcal{G}}$  where  $x \in V^{\mathcal{G}} \setminus Y$  and  $z \in V^{\mathcal{G}}$ , add the directed edge  $(x^1, z^1)$   
 507 to  $E_d^{\mathcal{H}}$ .
- 508 d. For any bidirected edge  $\{y_1, y_2\} \in E_b^{\mathcal{G}}$  where  $y_1, y_2 \in Y$ , add the bidirected edge  $\{y_1, y_2\}$  to  
 509  $E_b^{\mathcal{H}}$ .
- 510 e. For every  $x^1, x^2 \in V^{\mathcal{G}} \setminus Y$ , draw the two edges  $\{x^1, x^2\} \in E_b^{\mathcal{H}}$  and  $(x^2, x^1) \in E_d^{\mathcal{H}}$ . Furthermore,  
 511 the weight of  $\{x^1, x^2\}$  is  $C(x)$ .
- 512 f. The costs of the all other edges in  $\mathcal{H}$  are assigned to be infinite.

513 With abuse of notation, for any vertex  $x \in V^{\mathcal{G}} \setminus Y$ , we define  $\mathcal{T}_1(x) = \{x^2, x^1\} \in E_b^{\mathcal{H}}$ , where  
 514  $\{x^2, x^1\}$  is the bidirected edge in  $\mathcal{H}$  that corresponds to  $x$  in  $\mathcal{G}$ , and inherits the same weight (cost).

515 **Example 2.** Consider graph  $\mathcal{G}$  in Figure 4a. Vertices  $x$  and  $z$  are mapped to  $x^1, x^2$ , and  $z^1, z^2$ ,  
 516 respectively. Both a directed and a bidirected edge are drawn between these pairs. The bidirected  
 517 edge  $\{x^1, x^2\}$  is assigned the weight  $C(x) = c_x$ , and the bidirected edge  $\{z^1, z^2\}$  is assigned the  
 518 weight  $C(z) = c_z$ . Infinite weights are assigned to the rest of the edges in  $\mathcal{H}$  (Figure 4b).

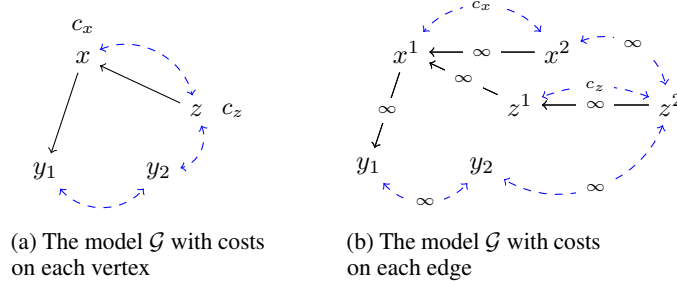

Figure 4: Reduction of MCIP to edge ID

**Proposition 3.** Suppose  $\mathcal{G}'$  is an ADMG,  $Y \subseteq V^{\mathcal{G}'}$  is a set of its vertices such that  $Y$  is a district in  $\mathcal{G}'[Y]$ , and  $\mathcal{H}' = \mathcal{T}_1(\mathcal{G}', Y)$ . Consider  $X \subseteq V^{\mathcal{G}'} \setminus Y$  as an arbitrary subset of vertices of  $\mathcal{G}'$ , and define  $\mathcal{G} = \mathcal{G}'[V^{\mathcal{G}'} \setminus X]$ . Let  $E_b'' = \{e \in E_b^{\mathcal{H}'} \mid \exists v \in X, e = \mathcal{T}_1(v)\}$  and define  $E_b^{\mathcal{H}} = E_b^{\mathcal{H}'} \setminus E_b''$ . Let  $\mathcal{H}$  be the edge-induced subgraph of  $\mathcal{H}'$  defined as  $\mathcal{H} = (V^{\mathcal{H}'}, E_d^{\mathcal{H}}, E_b^{\mathcal{H}})$ .  $Q[Y]$  is identifiable in  $\mathcal{G}$  if and only if  $Q[Y]$  is identifiable in  $\mathcal{H}$ .

*Proof.* We prove the contrapositive, i.e.,  $Q[Y]$  is not identifiable in  $\mathcal{G}$  iff  $Q[Y]$  is not identifiable in  $\mathcal{H}$ . Note that by construction,  $Y$  is a district in both  $\mathcal{G}[Y]$  and  $\mathcal{H}[Y]$ . That is, it suffices to show that there exists a hedge formed for  $Q[Y]$  in  $\mathcal{G}$  iff there exists a hedge formed for  $Q[Y]$  in  $\mathcal{H}$ .

To this end, we first prove the following claim. Let  $W \in V^{\mathcal{H}}$  form a hedge for  $Q[Y]$ . If  $x^1 \in W$  for some  $x \in V^{\mathcal{G}'}$ , then  $x^2 \in W$  and vice versa. That is, the two vertices  $x^1$  and  $x^2$  corresponding to the same vertex  $x$  in  $V^{\mathcal{G}'}$  appear only simultaneously in any hedge. To see this, note that by construction,  $x^1$  is the only child of  $x^2$ . By definition of hedge, if  $x^2 \in W$ , then it has a directed path to  $Y$  within  $\mathcal{H}[W]$ , and this path can only go through  $x^1$ . For the other direction, note that  $x^1$  has only one bidirected edge, which is with  $x^2$ . Again, by definition of hedge, if  $x^1 \in W$ , then it has a bidirected path to  $Y$  within  $\mathcal{H}[W]$ , and this path can only go through  $x^2$ . Hence, in the sequel, when there is a hedge  $W$  formed for  $Q[Y]$  in  $\mathcal{H}$ , we will without loss of generality assume that there exists a set of variables  $Z \subseteq V^{\mathcal{G}'}$  such that  $W = Z^1 \cup Z^2 \cup Y$ , where  $Z^1 = \{z^1 \mid z \in Z\}$  and  $Z^2 = \{z^2 \mid z \in Z\}$ .

*If part.* Let  $W = Z^1 \cup Z^2 \cup Y$  form a hedge for  $Q[Y]$  in  $\mathcal{H}$ . First note that since none of the bidirected edges between  $Z^1$  and  $Z^2$  are removed in  $\mathcal{H}$ , by construction, all vertices  $Z$  are present in  $\mathcal{G}$ , i.e.,  $Z \subseteq V^{\mathcal{G}}$ . Now we show that  $Z \cup Y$  forms a hedge for  $Q[Y]$  in  $\mathcal{G}$ . To this end, we prove  $\mathcal{G}[Z \cup Y]$  is a district and  $Z \cup Y = \text{Anc}_{\mathcal{G}[Z \cup Y]}(Y)$ . First note that any vertex in  $Z^1$  has only one bidirected edge to a vertex in  $Z^2$ . That is, if we consider the edge-induced subgraph of  $\mathcal{H}[W]$  over its bidirected edges, vertices of  $Z^1$  are leaf nodes. As a result,  $Z^2 \cup Y$  must be connected in this graph. That is,  $Z^2 \cup Y$  is a district in  $\mathcal{H}[Z^2 \cup Y]$ . This implies by construction of  $\mathcal{H}$  that  $\mathcal{G}[Z \cup Y]$  is a single district. With a similar reasoning, note that vertices in  $Z^2$  have no parents. As result,  $Z^1 \cup Y = \text{Anc}_{\mathcal{H}[Z^1 \cup Y]}(Y)$  (since the directed paths cannot go through  $Z^2$ ). Again, by construction, the edge-induced subgraph of  $\mathcal{G}[Z \cup Y]$  over its directed edges is a copy of  $\mathcal{H}[Z^1 \cup Y]$ . As a result,  $Z \cup Y = \text{Anc}_{\mathcal{G}[Z \cup Y]}(Y)$ .

*Only if part.* Let  $Z \cup Y$  form a hedge for  $Q[Y]$  in  $\mathcal{G}$ , where  $Z \subseteq V^{\mathcal{G}} \setminus Y$ . Define  $Z^1 = \{z^1 \mid z \in Z\}$  and  $Z^2 = \{z^2 \mid z \in Z\}$ . We show that  $Z^1 \cup Z^2 \cup Y$  forms a hedge for  $Q[Y]$  in  $\mathcal{H}$ . First, by definition of hedge,  $\text{Anc}_{\mathcal{G}[Z \cup Y]}(Y) = Z \cup Y$ . Since the edge-induced subgraph of  $\mathcal{H}[Z^1 \cup Y]$  is a copy of  $\mathcal{G}[Z \cup Y]$  by construction, we know  $\text{Anc}_{\mathcal{G}[Z^1 \cup Y]}(Y) = Z^1 \cup Y$ . Further, each vertex  $z^2 \in Z^2$  is a parent of  $z^1 \in Z^1$ . As a result,  $\text{Anc}_{\mathcal{G}[Z^1 \cup Z^2 \cup Y]}(Y) = Z^1 \cup Z^2 \cup Y$ . Now it suffices to show that  $Z^1 \cup Z^2 \cup Y$  is a district in  $\mathcal{H}[Z^1 \cup Z^2 \cup Y]$ . By definition of hedge,  $Z \cup Y$  is a district in  $\mathcal{G}[Z \cup Y]$ . By construction of  $\mathcal{H}$ , exactly the same bidirected edges (and therefore bidirected paths) exist in  $\mathcal{H}[Z^2 \cup Y]$ . Therefore,  $Z^2 \cup Y$  is a district in  $\mathcal{H}[Z^2 \cup Y]$ . Now note that by construction of  $\mathcal{H}'$ , each vertex  $z^1 \in Z^1$  has a bidirected edge to  $z^2 \in Z^2$ . And by definition of  $\mathcal{G}$  and  $\mathcal{H}$ , since the vertices  $Z$  exist in  $\mathcal{G}$ , none of these edges are removed in  $\mathcal{H}$ . As a result,  $Z^1 \cup Z^2 \cup Y$  is a district in  $\mathcal{H}[Z^1 \cup Z^2 \cup Y]$ , which completes the proof.  $\square$

559 *Proof of Theorem 1.* A polynomial-time reduction from MCIP to the edge ID problem follows  
 560 immediately from Proposition 3. MCIP is shown to be NP-hard [1]. As a result, the edge ID problem  
 561 is NP-hard.  $\square$

## 562 A.2 Reduction from edge ID to MCIP

563 **Proposition 2.** *There exists a polynomial-time reduction from edge ID to MCIP and vice versa.*

564 To prove Proposition 2, we begin with presenting a transformation  $\mathcal{T}_2(\mathcal{G}, Y)$  which is in the core of  
 565 reduction from edge ID to MCIP.

566 Suppose we want to solve the edge ID problem given ADMG  $\mathcal{G} = (V^{\mathcal{G}}, E_d^{\mathcal{G}}, E_b^{\mathcal{G}})$ , query  $Q[Y]$ , and  
 567 edge weights  $W_{\mathcal{G}} = \{w_e | e \in \mathcal{G}\}$ . Let  $X = V^{\mathcal{G}} \setminus Y$  denote the set of vertices of  $\mathcal{G}$  excluding  $Y$ .  
 568 We define the transformation  $(\mathcal{H}, Y^{mcip}) = \mathcal{T}_2(\mathcal{G}, Y)$  where  $\mathcal{H} = (V^{\mathcal{H}}, E_d^{\mathcal{H}}, E_b^{\mathcal{H}})$  is an ADMG and  
 569  $Y^{mcip} \subseteq V^{\mathcal{H}}$  as follows. Note that  $V^{\mathcal{H}}$  will consist of two disjoint set of vertices, namely  $V_{top}^{\mathcal{H}}$  and  
 570  $V_{bot}^{\mathcal{H}}$ , i.e.,  $V^{\mathcal{H}} = V_{top}^{\mathcal{H}} \cup V_{bot}^{\mathcal{H}}$ .

- 571 a. Begin with  $V_{top}^{\mathcal{H}} = V_{bot}^{\mathcal{H}} = \emptyset, Y^{mcip} = \emptyset$ . For any vertex  $v \in V^{\mathcal{G}}$ , add a vertex  $v$  to  $V_{top}^{\mathcal{H}}$  with  
 572 cost  $C(v) = \infty$ . If  $v \in Y$ , add  $v$  to  $Y^{mcip}$ .
- 573 b. For any directed edge  $(v_i, v_j) \in E_d^{\mathcal{G}}$  with weight  $w_{ij}^d$  in  $\mathcal{G}$ , add a new vertex  $v_{ij}^d$  to  $V_{top}^{\mathcal{H}}$ , with cost  
 574  $C(v_{ij}^d) = w_{ij}^d$ , where

$$v_{ij}^d = \begin{cases} x_{ij}^d & \text{if } v_i, v_j \in X, \\ z_{ij}^d & \text{if } v_i \in Y \text{ or } v_j \in Y, \\ y_{ij}^d & \text{if both } v_i, v_j \in Y. \end{cases}$$

- 575 Draw directed edges  $(v_i, v_{ij}^d)$  and  $(v_{ij}^d, v_j)$ . Further, draw a bidirected edge between  $v_i$  and  $v_{ij}^d$ .
- 576 c. For any bidirected edge  $\{x_i, x_j\} \in E_b^{\mathcal{G}}$  with weight  $w_{ij}^b$ , add a new vertex,  $x_{ij}^b$  to  $V_{top}^{\mathcal{H}}$  with cost  
 577  $C(x_{ij}^b) = w_{ij}^b$ . Add two bidirected edges  $\{x_i, x_{ij}^b\}$  and  $\{x_j, x_{ij}^b\}$ . Further, draw two directed  
 578 edges  $(x_{ij}^b, x_i)$  and  $(x_{ij}^b, x_j)$  in  $\mathcal{H}$ .
- 579 d. For any bidirected edge  $\{x_i, y_j\}$  with weight  $w_{ij}^b$ , add a new vertex  $z_{ij}^b$  to  $V_{top}^{\mathcal{H}}$  with cost  $C(z_{ij}^b) =$   
 580  $w_{ij}^b$ . Draw bidirected edges  $\{z_{ij}^b, x_i\}$  and  $\{z_{ij}^b, y_j\}$ . Then draw a directed edge from  $z_{ij}^b$  to  $x_i$ .
- 581 e. For any bidirected edge between  $\{y_i, y_j\} \in E_b^{\mathcal{G}}$  with weight  $w_{ij}^b$  in  $\mathcal{G}$ , add a new vertex,  $y_{ij}^b$  to  
 582  $V_{top}^{\mathcal{H}}$  with cost  $C(y_{ij}^b) = w_{ij}^b$ . Draw bidirected edges  $\{y_{ij}^b, y_i\}$  and  $\{y_{ij}^b, y_j\}$ . Further, for any  
 583  $x \in X$ , draw a directed edge from  $y_{ij}^b$  to  $x$ .
- 584 f. Let  $y_1 \prec \dots \prec y_k$  denote a topological ordering among vertices of  $Y$ . For every pair  $\{y_i, y_j\}$   
 585 of vertices of  $Y$ , where  $i < j$ , add vertices  $y_i^{ij}, y_{i+1}^{ij}, \dots, y_j^{ij}$  to  $V_{bot}^{\mathcal{H}}$ . Add  $y_j^{ij}$  to  $Y^{mcip}$ . Draw  
 586 the directed edges  $(y_k, y_k^{ij})$  for every  $i \leq k \leq j$ . Draw the directed edges  $(y_k^{ij}, y_i^{ij})$  for every  
 587  $i < k < j$ , and the directed edge  $(y_i^{ij}, y_j^{ij})$ . Draw a bidirected edge between  $y_j$  and  $y_i^{ij}$ . Further,  
 588 for any bidirected edge  $\{y_k, y_l\} \in E_b^{\mathcal{G}}$  where  $i \leq k, l \leq j$ , add a new vertex  $y_{kl}^{ij}$  to  $V_{bot}^{\mathcal{H}}$ , draw  
 589 two bidirected edges  $\{y_{kl}^{ij}, y_k^{ij}\}$  and  $\{y_{kl}^{ij}, y_l^{ij}\}$ , and a directed edge  $(y_{kl}^{ij}, y_{ij}^b)$ . The costs of the all  
 590 of the vertices in  $V_{bot}^{\mathcal{H}}$  are infinite.

591 With abuse of notation, for any bidirected edge  $e_{ij}^b = \{v_i, v_j\} \in E_b^{\mathcal{G}}$  and any directed edge  $e_{ij}^d =$   
 592  $(v_i, v_j) \in E_d^{\mathcal{G}}$ , we define  $\mathcal{T}_2(e_{ij}^b) = v_{ij}^b$  and  $\mathcal{T}_2(e_{ij}^d) = v_{ij}^d$ , respectively, where  $v_{ij}^b, v_{ij}^d \in V^{\mathcal{H}}$  are the  
 593 vertices representing their corresponding edges.

594 We will utilize the following results to prove Proposition 2. More precisely, Lemmas 2 through 9 are  
 595 used to prove Proposition 4, which in turn is used to prove Proposition 2.

596 **Lemma 2.** *Suppose  $\mathcal{G}$  is an ADMG,  $Y$  is a set of its vertices, and  $(\mathcal{H}, Y^{mcip}) = \mathcal{T}(\mathcal{G}, Y)$ . Each  
 597 vertex  $y \in Y^{mcip}$  is a district in  $\mathcal{H}$ .*

598 *Proof.* It suffices to show that for every pair of  $v_1, v_2 \in Y^{mcip}$  there is no bidirected edge between  
 599 them in  $\mathcal{H}$ . Suppose first that  $v_1, v_2 \in Y$ . Any bidirected edge between  $v_1$  and  $v_2$  in  $\mathcal{G}$  (if it exists)

is removed in step (e) of the transformation, and none of the steps (a) through (f) add a bidirected edge between them. Otherwise, at least one of  $v_1, v_2$ , w.l.o.g.  $v_1$ , is in  $Y^{mcip} \setminus Y$ . Suppose w.l.o.g. that  $v_1 = y_j^{ij}$ . From step (f) of the transformation  $\mathcal{T}$ , we know that  $v_1$  has bidirected edges only to vertices  $y_{kj}^{ij}$ , where none of them is a member of  $Y^{mcip}$ .  $\square$

**Lemma 3.** Suppose  $\mathcal{G}$  is an ADMG,  $Y$  is a set of its vertices, and  $(\mathcal{H}, Y^{mcip}) = \mathcal{T}_2(\mathcal{G}, Y)$ . Suppose there is a hedge formed for  $Q[y]$  in  $\mathcal{H}$ , where  $y \in Y$ . Let  $H$  denote the set of vertices of this hedge.  $H$  does not include any of the vertices added in the step (f) of the transformation. That is,  $H \cap V_{bot}^{\mathcal{H}} = \emptyset$ .

*Proof.* Define  $V_1 = \{y_{kl}^{ij} \in V_{bot}^{\mathcal{H}}, \forall i, j, k, l\}$ , and  $V_2 = V_{bot}^{\mathcal{H}} \setminus V_1$ . By construction of  $\mathcal{H}$ , the vertices of  $V_2$  have directed edges only to vertices in  $V_2$ . Therefore, for each vertex  $v \in V_2$ , we have  $v \notin Anc_{\mathcal{H}[H]}(y)$ . As a result,  $V_2 \cap H = \emptyset$ , since by definition of hedge, any vertex of  $H$  is an ancestor of  $y$  in  $\mathcal{H}[H]$ . Now, consider an arbitrary vertex  $v \in V_1$ . By construction of  $\mathcal{H}$ , if there exists a bidirected edge  $\{v, v'\} \in E_b^{\mathcal{H}}$ , we must have that  $v' \in V_2$ . Therefore, if  $v \in H$ , there must be at least one vertex  $v' \in V_2 \cap H$ . Since we proved  $V_2 \cap H = \emptyset$ ,  $v$  cannot be in  $H$ . Consequently,  $V_1 \cap H = \emptyset$ .  $\square$

**Lemma 4.** Suppose  $\mathcal{G}$  is an ADMG,  $Y$  is a set of its vertices, and  $(\mathcal{H}, Y^{mcip}) = \mathcal{T}(\mathcal{G}, Y)$ . Suppose there is a hedge formed for  $Q[y_j^{ij}]$  in  $\mathcal{H}$ , where  $y_i, y_j \in Y$  and  $y_j^{ij}$  is the vertex corresponding to the pair  $(y_i, y_j)$  added in step (f) of the transform  $\mathcal{T}$ . Let  $H$  denote the set of vertices of this hedge. If  $v \in H \cap V_{bot}^{\mathcal{H}}$ , then  $v$  has the superscript  $ij$ , that is,  $v$  is either one of the vertices  $y_k^{ij}$ , or one of the vertices  $y_{kl}^{ij}$ , where  $i \leq k, l \leq j$ . In the latter case,  $y_{kl}^b \in H$ .

*Proof.* Define  $V_1 = \{y_{kl}^{mn} \in V_{bot}^{\mathcal{H}}, \forall m, n, k, l\}$ , and  $V_2 = V_{bot}^{\mathcal{H}} \setminus V_1$ . Suppose  $V_1^* = \{v_{kl}^{ij} \in V_{bot}^{\mathcal{H}}, \forall k, l\}$  and  $V_2^* = \{v_k^{ij} \in V_{bot}^{\mathcal{H}}, \forall k\}$ . Also define  $V_1' = V_1 \setminus V_1^*$ ,  $V_2' = V_2 \setminus V_2^*$ . For the first part of the claim, it suffices to show that  $V_1' \cap H = \emptyset, V_2' \cap H = \emptyset$ . By construction of  $\mathcal{H}$ , the vertices of  $V_2'$  do not have any child out of  $V_2'$ . Therefore,  $V_2' \cap Anc_{\mathcal{H}[H]}(y_j^{ij}) = \emptyset$ . This implies that  $V_2' \cap H = \emptyset$ . Now let  $v_1^{i'j'}$  be an arbitrary vertex in  $V_1'$ . By construction of  $\mathcal{H}$ ,  $v_1^{i'j'}$  has bidirected edges only to vertices of  $V_2'$ . This implies that if  $v_1^{i'j'} \in H$ , there must be at least one vertex of  $V_2'$  in  $H$  which is in contradiction with  $V_2' \cap H = \emptyset$ . Therefore,  $v_1^{i'j'} \notin H$ . Since  $v_1^{i'j'}$  is an arbitrary vertex in  $V_1'$ , we conclude  $V_1' \cap H = \emptyset$ .

Now, we prove that if  $v \in H$  is one of the vertices  $y_{kl}^{ij}$ , we have  $y_{kl}^b \in H$ . Since  $y_{kl}^{ij} \in H$ , there exists a directed path from  $y_{kl}^{ij}$  to  $y_j^{ij}$  in  $\mathcal{H}[H]$ . Since  $y_{kl}^b$  is the only child of  $y_{kl}^{ij}$ , the aforementioned path passes through  $y_{kl}^b$ . Therefore,  $y_{kl}^b \in H$ .  $\square$

**Lemma 5.** Suppose  $\mathcal{G}' = (V^{\mathcal{G}'}, E_d^{\mathcal{G}'}, E_b^{\mathcal{G}'})$  is an ADMG,  $Y \subseteq V^{\mathcal{G}'}$  is a set of its vertices, and  $(\mathcal{H}', Y^{mcip}) = \mathcal{T}(\mathcal{G}', Y)$ . Let  $E_d'' \subseteq E_d^{\mathcal{G}'}$  and  $E_b'' \subseteq E_b^{\mathcal{G}'}$  be arbitrary edges of  $\mathcal{G}$ , and define  $E_d^{\mathcal{G}} = E_d^{\mathcal{G}'} \setminus E_d''$ ,  $E_b^{\mathcal{G}} = E_b^{\mathcal{G}'} \setminus E_b''$ . Define  $\mathcal{G} = (V^{\mathcal{G}}, E_d^{\mathcal{G}}, E_b^{\mathcal{G}})$  and  $\mathcal{H} = \mathcal{H}'[V^{\mathcal{H}'} \setminus V']$ , where  $V^{\mathcal{G}} = V^{\mathcal{G}'}$  and  $V' = \{v \in V^{\mathcal{H}'} | \exists e \in E_b'' \cup E_d'', v = \mathcal{T}_2(e)\}$ . Suppose there is a hedge formed for  $Q[y_j^{ij}]$  in  $\mathcal{H}$  for some  $i, j$ . Let  $H$  denote the set of vertices of this hedge in  $\mathcal{H}$ . The set of vertices  $Y^* = \{y_k | y_k^{ij} \in H\}$  is a district in  $\mathcal{G}[Y]$ . Moreover,  $H_{top} = Anc_{\mathcal{H}[H_{top}]}(Y^*)$ , where  $H_{top} = H \cap V_{top}^{\mathcal{H}}$ .

*Proof.* First we prove that  $Y^*$  is a district in  $\mathcal{G}[Y]$ . Consider an arbitrary vertex  $y_k^{ij}$  in  $H$ . By definition of hedge, there exists a bidirected path,  $p_1$ , between  $y_k^{ij}$  and  $y_j^{ij}$  in  $\mathcal{H}[H]$ . Let  $Y^{ij}$  denotes the set of vertices in  $H$  such that their superscript is  $ij$ . Lemma 4 implies that  $H \subseteq V_{top}^{\mathcal{H}} \cup Y^{ij}$ . Furthermore, by construction of  $\mathcal{H}$ , there is only one bidirected edge between  $Y^{ij}$  and  $H \setminus Y^{ij}$ , which is  $\{y_j, y_i^{ij}\}$ . Therefore, all of the vertices on the path  $p_1$  are in  $Y^{ij}$ . Now, we define  $Y_1' = \{y_k | y_k^{ij} \in p_1\}$  and

644  $Y'_2 = \{y_{kl}^b | y_{kl}^{ij} \in p_1\}$ , i.e., the  $V_{top}^{\mathcal{H}}$  counterparts of the vertices in  $p_1$ . Since the vertices on  $p_1$   
645 are in  $H$ ,  $Y'_1 \subseteq Y^*$ . From Lemma 4, we know that if  $y_{kl}^{ij} \in H$ , then,  $y_{kl}^b \in H$ . It implies that  
646  $Y'_2 \subseteq H$ . As a result,  $Y'_1$  and  $Y'_2$  are both vertices of  $\mathcal{H}$ . Now if we replace all the vertices in  $p_1$  with  
647 their corresponding counterpart in  $Y'_1 \cup Y'_2$ , we arrive at a bidirected path  $p_2$  between  $y_k$  and  $y_j$  in  
648  $\mathcal{H}[Y'_1 \cup Y'_2]$  (as by construction the same edges exist in  $V_{top}^{\mathcal{H}}$ ). By definition of  $\mathcal{G}$  and  $\mathcal{H}$ , if a vertex  
649  $y_{kl}^b$  exists in  $\mathcal{H}$ , the corresponding edge  $\{y_k, y_l\}$  exists in  $\mathcal{G}$ . As a result, a bidirected path between  $y_k$   
650 and  $y_l$  exists in  $\mathcal{G}[Y'_1]$ . Noting that  $y_k$  is an arbitrary vertex in  $Y^*$  and  $Y'_1 \subseteq Y^*$ , this implies that all  
651 of the vertices of  $Y^*$  are in the same district as  $y_j$  in  $\mathcal{G}[Y^*]$ , which completes the proof.

652 Next, we prove that  $H_{top} = Anc_{\mathcal{H}[H_{top}]}(Y^*)$ . To this end, it suffices to show that there is a directed  
653 path from an arbitrary vertex  $v \in H_{top}$  to  $Y^*$  in  $\mathcal{H}[H_{top}]$ . Since  $H$  forms a hedge for  $Q[y_j^{ij}]$  in  $\mathcal{H}$ ,  
654 there exists a directed path from  $v$  to  $y_j^{ij}$  in  $\mathcal{H}[H]$ . This path must go through the only parent of  $y_j^{ij}$ ,  
655 which is  $y_i^{ij}$ . Then, the last vertex on the path is one of the parents of  $y_i^{ij}$ . If this parent is  $y_i$ , we are  
656 done as we have a directed path from  $v$  to  $y_i$ , where  $y_i \in Y^*$  and it has no ancestors in  $H \setminus H_{top}$ .  
657 Otherwise, let this parent be  $y_k^{ij}$  for some  $i < k < j$ . Now the last vertex on the path before  $y_k^{ij}$  must  
658 be  $y_k$ , which is the only parent of  $y_k^{ij}$ . Note that by definition of  $Y^*$ ,  $y_k \in Y^*$ . Therefore,  $v$  has a  
659 directed path to  $Y^*$  in  $\mathcal{H}[H_{top}]$ .  $\square$

660 **Lemma 6.** Suppose  $\mathcal{G} = (V^{\mathcal{G}}, E_d^{\mathcal{G}}, E_b^{\mathcal{G}})$  is an ADMG,  $Y$  is a set of its vertices, and  $(\mathcal{H}, Y^{mcip}) =$   
661  $\mathcal{T}_2(\mathcal{G}, Y)$ . Suppose there is a hedge formed for  $Q[y]$  in  $\mathcal{H}$  for some  $y \in Y^{mcip}$ . Let  $H$  denote the set  
662 of vertices of this hedge. Then  $H \cap X \neq \emptyset$ , where  $X = V^{\mathcal{G}} \setminus Y$ .

663 *Proof.* Since  $H$  forms a hedge for  $Q[y]$  in  $\mathcal{H}$ , there exists a vertex  $h \in H$  such that  $\{y, h\} \in E_b^{\mathcal{H}}$ .  
664 There are two possibilities for  $y \in Y^{mcip}$ :

- 665 •  $y = y_i \in Y$ . From Lemma 4 we have  $h \notin V_{bot}^{\mathcal{H}}$ . Therefore, by construction of  $\mathcal{H}$ ,  $h = y_{ij}^b$   
666 for some  $j$ .
- 667 •  $y = y_j^{ij} \in V_{bot}^{\mathcal{H}}$ . By construction of  $\mathcal{H}$ ,  $h = y_{kj}^{ij}$  for some  $k$ . Vertex  $h$  must have a directed  
668 path to  $y$  in  $H$  by definition of hedge, which must go through the only child of  $h$ , i.e.,  $y_{kl}^b$ .

669 In both cases, we showed that there exists a vertex  $v = y_{ij}^b \in H$  for some  $i, j$ . By definition of hedge,  
670 there is a bidirected path,  $p$ , from  $v$  to  $y$  in  $\mathcal{H}$  because  $v \in Anc_{\mathcal{H}}(y)$ . Since all of the children of  $v$  are  
671 in  $X$ , there is at least one vertex in  $X$  on path  $p$ . Therefore,  $H$  includes at least one vertex of  $X$ .  $\square$

672  
673 **Lemma 7.** [Inverse transform preserves hedges.] Suppose  $\mathcal{G}' = (V^{\mathcal{G}'}, E_d^{\mathcal{G}'}, E_b^{\mathcal{G}'})$  is an ADMG,  
674  $Y \subseteq V^{\mathcal{G}'}$  is a set of its vertices, and  $(\mathcal{H}', Y^{mcip}) = \mathcal{T}_2(\mathcal{G}', Y)$ . Let  $E_d'' \subseteq E_d^{\mathcal{G}'}$  and  $E_b'' \subseteq E_b^{\mathcal{G}'}$  be  
675 arbitrary edges of  $\mathcal{G}$ , and define  $E_d^{\mathcal{G}} = E_d^{\mathcal{G}'} \setminus E_d''$ ,  $E_b^{\mathcal{G}} = E_b^{\mathcal{G}'} \setminus E_b''$ . Define  $\mathcal{G} = (V^{\mathcal{G}}, E_d^{\mathcal{G}}, E_b^{\mathcal{G}})$   
676 and  $\mathcal{H} = \mathcal{H}'[V^{\mathcal{H}'} \setminus V']$ , where  $V^{\mathcal{G}} = V^{\mathcal{G}'}$  and  $V' = \{v \in V^{\mathcal{H}'} | \exists e \in E_b'' \cup E_d'', v = \mathcal{T}_2(e)\}$ . Let  
677  $W \subseteq V_{top}^{\mathcal{H}}$  be a set of vertices of  $\mathcal{H}$ . Let  $W_s \subseteq W \cap V^{\mathcal{G}}$  be a subset of  $W$  such that  $W_s$  are vertices  
678 of  $\mathcal{G}$  as well. Consider the inverse transform of  $\mathcal{H}[W]$  in the ADMG  $\mathcal{G}$ , i.e., for any  $v = v_{ij}^b \in W$ ,  
679 delete  $v$  and all edges incident to it and draw a bidirected edge between  $v_i$  and  $v_j$ , and for any  
680  $v = v_{ij}^d$ , delete  $v$  and all edges incident to it and draw a directed edge from  $v_i$  to  $v_j$ . Let the resulting  
681 subgraph (which is a subgraph of  $\mathcal{G}$ ) be denoted by  $\mathcal{G}[W^{-1}]$  with the set of vertices  $W^{-1} \subseteq V^{\mathcal{G}}$ . If  
682  $Anc_{\mathcal{H}[W]}(W_s) = W$ , then  $Anc_{\mathcal{G}[W^{-1}]}(W_s) = W^{-1}$ . Moreover, if  $W$  is a district in  $\mathcal{H}[W]$ , then  
683  $W^{-1}$  is a district in  $\mathcal{G}[W^{-1}]$ .

684 *Proof.* First, we show that if  $Anc_{\mathcal{H}[W]}(W_s) = W$ , then  $Anc_{\mathcal{G}[W^{-1}]}(W_s) = W^{-1}$ . Let  $v$  be an  
685 arbitrary vertex in  $W^{-1}$ . Vertex  $v$  is in  $W$  because  $W^{-1} \subseteq W$ . Since  $v \in W$  and  $v \in Anc_{\mathcal{H}[W]}(W_s)$ ,  
686  $v$  has a directed path  $v \rightarrow \dots v_i \rightarrow v_{ij}^d \rightarrow v_j \dots \rightarrow w$ , denoted by  $l$ , to a vertex  $w \in W_s$  in  $\mathcal{H}[W]$ .  
687 For each vertex  $v_{ij}^d$  on path  $l$ , we have  $v_i, v_j \in \mathcal{G}[W^{-1}]$  and since  $v_{ij}^d \in V^{\mathcal{H}}$ , by definition of  $\mathcal{G}$   
688 and  $\mathcal{H}$ , there exists  $(v_i, v_j) \in E_d^{\mathcal{G}}$  s.t.  $i \prec j$ , and consequently,  $(v_i, v_j) \in E_d^{\mathcal{G}[W^{-1}]}$ . Therefore,

there exists a directed path from  $v$  to  $w$  in  $\mathcal{G}[W^{-1}]$ . Noting that  $v$  is an arbitrary vertex in  $W^{-1}$ , we conclude that  $\text{Anc}_{\mathcal{G}[W^{-1}]}(W_s) = W^{-1}$ .

Now, we prove that if  $W$  is a district in  $\mathcal{H}[W]$ , then  $W^{-1}$  is a district in  $\mathcal{G}[W^{-1}]$ . Consider two vertices  $v_1, v_2 \in W^{-1}$ . Since  $v_1, v_2 \in W$  and  $W$  is a district, there exists a bidirected path  $v_1 \leftrightarrow \dots \leftrightarrow v_i \leftrightarrow v_{ij}^b \leftrightarrow v_j \leftrightarrow \dots \leftrightarrow v_2$ , denoted by  $p$ , between  $v_1$  and  $v_2$  in  $\mathcal{H}[W]$ . Each vertex  $v_{ij}^b$  on path  $p$  is in  $\mathcal{H}$  and  $v_i, v_j \in \mathcal{G}[W^{-1}]$ . By definition of  $\mathcal{G}$  and  $\mathcal{H}$ , we have  $\{v_i, v_j\} \in E_b^{\mathcal{G}}$ . Therefore,  $\{v_i, v_j\} \in E_b^{\mathcal{G}[W^{-1}]}$ . Then, there is a bidirected path between  $v_1$  and  $v_2$  in  $\mathcal{G}[W^{-1}]$ . Since  $v_1$  and  $v_2$  are two arbitrary vertices in  $W^{-1}$ , it implies that  $W^{-1}$  is a district in  $\mathcal{G}[W^{-1}]$ .  $\square$

**Lemma 8.** [Transform preserves hedges.] Suppose  $\mathcal{G}' = (V^{\mathcal{G}'}, E_d^{\mathcal{G}'}, E_b^{\mathcal{G}'})$  is an ADMG,  $Y \subseteq V^{\mathcal{G}'}$  is a set of its vertices, and  $(\mathcal{H}', Y^{mcip}) = \mathcal{T}_2(\mathcal{G}', Y)$ . Let  $E_d'' \subseteq E_d^{\mathcal{G}'}$  and  $E_b'' \subseteq E_b^{\mathcal{G}'}$  be arbitrary edges of  $\mathcal{G}$ , and define  $E_d^{\mathcal{G}} = E_d^{\mathcal{G}'} \setminus E_d''$ ,  $E_b^{\mathcal{G}} = E_b^{\mathcal{G}'} \setminus E_b''$ . Define  $\mathcal{G} = (V^{\mathcal{G}}, E_d^{\mathcal{G}}, E_b^{\mathcal{G}})$  and  $\mathcal{H} = \mathcal{H}'[V^{\mathcal{H}'} \setminus V']$ , where  $V^{\mathcal{G}} = V^{\mathcal{G}'}$  and  $V' = \{v \in V^{\mathcal{H}'} \mid \exists e \in E_b'' \cup E_d'', v = \mathcal{T}_2(e)\}$ . Let  $W \subseteq V^{\mathcal{G}}$  be a set of vertices of  $\mathcal{G}$  such that  $W \setminus Y \neq \emptyset$ . Let  $W_s \subseteq W$  be a subset of  $W$ . Let the transformed graph of  $\mathcal{G}[W]$  under  $\mathcal{T}_2$  be denoted by  $\mathcal{H}''$ , where  $\mathcal{H}'' \subseteq \mathcal{H}$ . Define  $W^* = V_{top}^{\mathcal{H}''}$ . If  $\text{Anc}_{\mathcal{G}[W]}(W_s) = W$ , then  $\text{Anc}_{\mathcal{H}[W^*]}(W_s) = W^*$ . Moreover, if  $W$  is a district in  $\mathcal{G}[W]$ , then  $W^*$  is a district in  $\mathcal{H}[W^*]$ .

*Proof.* First, we prove that if  $\text{Anc}_{\mathcal{G}[W]}(W_s) = W$ , then  $\text{Anc}_{\mathcal{H}[W^*]}(W_s) = W^*$ . Take an arbitrary vertex  $v \in W^*$ . There are two possibilities for  $v$ :

- $v \in W$ . That is, vertex  $v$  is in  $\mathcal{G}[W]$ .
- $v \notin W$ . This implies that  $v$  represents an edge  $e$  between two vertices  $v_i$  and  $v_j$  in  $\mathcal{G}[W]$ . There are three possibilities for  $e$ :
  - $e = (v_i, v_j)$ . By construction of  $\mathcal{H}$ ,  $v$  is parent of  $v_j$  in  $\mathcal{H}[W^*]$ , where  $v_j$  is a vertex of  $\mathcal{G}[W]$ .
  - $e = \{v_i, v_j\}$  and  $v_i \in X$  or  $v_j \in X$ . In this case,  $v$  is parent of at least one of  $v_i$  and  $v_j$  in  $\mathcal{H}[W^*]$ , w.l.o.g.  $v_i$ , where  $v_i$  is a vertex of  $\mathcal{G}[W]$ .
  - $e = \{v_i, v_j\}$  and  $v_i, v_j \in Y$ . By construction of  $\mathcal{H}$ ,  $v$  is parent of all vertices in  $V^{\mathcal{G}} \setminus Y$ . Since  $W \setminus Y \neq \emptyset$ , there exists a vertex  $x$  in  $\mathcal{G}[W]$  such that  $v$  is a parent of  $x$ .

In all three cases above, we proved that there exists a vertex  $x \in W$  such that  $v$  is a parent of  $x$ .

Therefore, we showed that any vertex  $v \in W^*$  either is itself a vertex in  $W$  or is a parent of a vertex in  $W$ . As a result, it suffices to show that every  $w \in W$  has a directed path to  $W_s$  in  $\mathcal{H}[W^*]$ . We know that  $w$  has a directed path to  $W_s$  in  $\mathcal{G}[W]$  such as  $p$ . Take an arbitrary pair of consecutive vertices on this path, such as  $v_1$  and  $v_2$ . The directed edge  $(v_1, v_2)$  exists in  $\mathcal{G}[W]$ . As a result, the directed path  $v_1 \rightarrow v_{12}^d \rightarrow v_2$  exists in  $\mathcal{H}[W^*]$ . Starting at  $w$  and repeating this argument for every pair of consecutive vertices on  $p$ , we conclude that there exists a directed path from  $w$  to  $W_s$ , which completes the proof.

Now, we show that if  $W$  is a district in  $\mathcal{G}[W]$ , then  $W^*$  is a district in  $\mathcal{H}[W^*]$ . Take an arbitrary vertex  $v \in W^*$ . There are two possibilities for  $v$ :

- $v \in W$ . That is,  $v$  is a vertex in  $\mathcal{G}[W]$ .
- $v \notin W$ . In this case, at least one of the vertices  $v$  represents an edge  $e$  between two vertices  $v_i$  and  $v_j$  in  $\mathcal{G}[W]$ . By construction of  $\mathcal{H}$ ,  $v$  is connected to at least one of  $v_i$  or  $v_j$ , w.l.o.g.  $v_i$ , by a bidirected edge, where  $v_i \in W$ .

We showed that any vertex  $v \in W^*$  either is in  $W$ , or is connected to a vertex in  $W$  through a bidirected edge. Therefore, it suffices to show that for any two vertices  $w_1, w_2 \in W$  there exists a bidirected path between  $w_1$  and  $w_2$  in  $\mathcal{H}[W^*]$ . Since  $w_1, w_2 \in W$ , there is a bidirected path  $p$ , between  $w_1$  and  $w_2$  in  $\mathcal{G}[W]$ . Take an arbitrary pair of consecutive vertices on this path, such as  $v_1$  and  $v_2$ . The bidirected edge  $\{v_1, v_2\}$  exists in  $\mathcal{G}[W]$ . As a result, the bidirected path  $v_1 \leftrightarrow v_{12}^b \leftrightarrow v_2$



exists in  $\mathcal{H}[W^*]$ . Starting at  $w$  and repeating this argument for every pair of consecutive vertices on  $p$ , we conclude that there exists a bidirected path from  $w_1$  to  $w_2$ , which completes the proof.  $\square$

**Lemma 9.** Suppose  $\mathcal{G}$  is an ADMG, and  $Y$  is a subset of its vertices. Also let  $Y^*$  be a district in  $\mathcal{G}[Y]$ . If the set of vertices  $H$  form a hedge for  $Q[Y^*]$ , then  $H \setminus Y \neq \emptyset$ .

*Proof.* Assume by contradiction  $H \setminus Y = \emptyset$ , i.e.,  $H \subseteq Y$ . By definition of hedge, we know  $H \setminus Y^* \neq \emptyset$ . Take an arbitrary vertex  $v \in H \setminus Y^*$ . Furthermore,  $v \in Y \setminus Y^*$  because  $H \subseteq Y$ . Since  $H$  forms a hedge for  $Q[Y^*]$ ,  $H$  is a district in  $\mathcal{G}[H]$ . Therefore, there exists a bidirected path between  $v$  and a vertex  $y^* \in Y^*$  in  $\mathcal{G}[Y]$  which is in contradiction with the assumption that  $Y^*$  is a district in  $\mathcal{G}[Y]$ .  $\square$

**Proposition 4.** Suppose  $\mathcal{G}' = (V^{\mathcal{G}'}, E_d^{\mathcal{G}'}, E_b^{\mathcal{G}'})$  is an ADMG,  $Y \subseteq V^{\mathcal{G}'}$  is a set of its vertices, and  $(\mathcal{H}', Y^{mcip}) = \mathcal{T}_2(\mathcal{G}', Y)$ . Let  $E_d'' \subseteq E_d^{\mathcal{G}'}$  and  $E_b'' \subseteq E_b^{\mathcal{G}'}$  be arbitrary edges of  $\mathcal{G}$ , and define  $E_d^{\mathcal{G}} = E_d^{\mathcal{G}'} \setminus E_d''$ ,  $E_b^{\mathcal{G}} = E_b^{\mathcal{G}'} \setminus E_b''$ .  $Q[Y]$  is identifiable in  $\mathcal{G} = (V^{\mathcal{G}}, E_d^{\mathcal{G}}, E_b^{\mathcal{G}})$  if and only if  $Q[Y^{mcip}]$  is identifiable in  $\mathcal{H} = \mathcal{H}'[V^{\mathcal{H}'} \setminus V']$ , where  $V^{\mathcal{G}} = V^{\mathcal{G}'}$  and  $V' = \{v \in V^{\mathcal{H}'} \mid \exists e \in E_b'' \cup E_d'', v = \mathcal{T}_2(e)\}$ .

*Proof.* We prove the contrapositive, i.e.,  $Q[Y]$  is not identifiable in  $\mathcal{G}$  iff  $Q[Y^{mcip}]$  is not identifiable in  $\mathcal{H}$ .

*If part.* Suppose  $Q[Y^{mcip}]$  is not identifiable in  $\mathcal{H}$ . That is, there exists a hedge formed for  $Q[Y^{mcip}]$  in  $\mathcal{H}$ . From Lemma 2, this hedge is formed for  $Q[y']$  for some  $y' \in Y^{mcip}$ . Denote the set of vertices of this hedge by  $H$ . We consider two possibilities separately:

- $y' = y_i$ , where  $y_i \in Y$ . From Lemma 3,  $H \subseteq V_{top}^{\mathcal{H}}$ . Taking  $W = H$  in Lemma 7,  $W^{-1}$  is a set of vertices in  $\mathcal{G}$  such that  $Anc_{\mathcal{G}[W^{-1}]}(y) = W^{-1}$ , and  $W^{-1}$  is a district in  $\mathcal{G}$ . Now take  $Y^*$  to be the district of  $\mathcal{G}[Y]$  that includes  $y_i$ . By definition of hedge,  $\mathcal{G}[W^{-1} \cup Y^*]$  forms a hedge for  $Q[Y^*]$  in  $\mathcal{G}$ . Note that from Lemma 6,  $W^{-1} \setminus Y \neq \emptyset$ . As a result,  $Q[Y]$  is not identifiable in  $\mathcal{G}$ .
- $y' = y_j^{ij}$ , where  $y_i, y_j \in Y$  and  $y'$  is one of the vertices added to  $\mathcal{H}$  in the last step of the transformation  $\mathcal{T}$  (step (f)). Define the set  $Y^* = \{y_k \mid y_k^{ij} \in H\}$ . From Lemma 5,  $Y^*$  is a district in  $\mathcal{G}$ , and therefore a district in  $\mathcal{G}[Y]$ . As a result, it suffices to show that there exists a hedge formed for  $Q[Y^*]$  in  $\mathcal{G}$ . Now define  $H_{top} = H \cap V_{top}^{\mathcal{H}}$ . By definition of hedge,  $H$  is a district in  $\mathcal{H}[H]$ , i.e., it is connected over its bidirected edges. By construction of  $\mathcal{H}$ , there is only one bidirected edge between the vertices in  $H_{top}$  and  $H \setminus H_{top}$ , which is the bidirected edge between  $y_j$  and  $y_i^{ij}$ . Therefore, this edge is a cut set that partitions the graph  $\mathcal{H}[H]$  into two connected components  $\mathcal{H}[H_{top}]$  and  $\mathcal{H}[H \setminus H_{top}]$ . That is,  $\mathcal{H}[H_{top}]$  is connected over its bidirected edges and therefore  $H_{top}$  is a district in  $\mathcal{H}[H_{top}]$ . Further, from Lemma 5,  $H_{top} = Anc_{\mathcal{H}[H_{top}]}(Y^*)$ . Noting that  $H_{top} \subseteq V_{top}^{\mathcal{H}}$ , taking  $W = H_{top}$  in Lemma 7,  $W^{-1}$  is a district in  $\mathcal{G}$  and  $Anc_{\mathcal{G}[W^{-1}]}(Y^*) = W^{-1}$ . Note that from Lemma 6,  $W^{-1} \setminus Y \neq \emptyset$ . Therefore, the set of vertices  $W^{-1}$  form a hedge for  $Q[Y^*]$  in  $\mathcal{G}$ . Hence,  $Q[Y]$  is not identifiable in  $\mathcal{G}$ .

*Only if part.* Suppose  $Q[Y]$  is not identifiable in  $\mathcal{G}$ . It implies that there exists a district of  $\mathcal{G}[Y]$  such as  $Y^*$  such that there is a hedge formed for  $Q[Y^*]$  in  $\mathcal{G}$ . Let  $H$  denote the set of vertices of this hedge. From Lemma 9,  $H \setminus Y \neq \emptyset$ . Define  $W^*$  as in Lemma 8, that is the transform  $\mathcal{T}(\mathcal{G}[H], Y^*)$  without step (f) (only on the vertices of  $V_{top}^{\mathcal{H}}$ ). Note that  $Y^* \subseteq W^*$ . We consider the following two cases separately:

- $Y^* = \{y\}$ , that is,  $Y^*$  is a single vertex. From Lemma 8,  $W^*$  is a district in  $\mathcal{H}[W^*]$ , and  $Anc_{\mathcal{H}[W^*]}(y) = W^*$ . By definition of hedge, the vertices  $W^*$  form a hedge for  $Q[y]$  in  $\mathcal{H}$ . Note that  $y \in Y^{mcip}$ , and from Lemma 2 it is a district of  $\mathcal{H}[Y^{mcip}]$ . As a result,  $Q[Y^{mcip}]$  is not identifiable in  $\mathcal{H}$ .

781 •  $|Y^*| \geq 2$ . Let  $y_i$  and  $y_j$  be the first and the last vertices of  $Y^*$  in the topological order. Define  
 782  $Y^{ij*} = \{y_k^{ij} | y_k \in Y^*\} \cup \{y_{kl}^{ij} | y_k, y_l \in Y^*\}$ .  $Y^{ij*}$  are the vertices in  $V_{bot}^{\mathcal{H}}$  with superscript  
 783  $ij$  corresponding to the vertices in  $Y^*$ . Note that  $y_i^{ij}, y_j^{ij} \in Y^{ij*}$ , since  $y_i, y_j \in Y^*$ . Since  
 784  $y_j^{ij} \in Y^{mcip}$  and from Lemma 2  $y_j^{ij}$  is a district in  $\mathcal{H}[Y^{mcip}]$ , it suffices to show that there  
 785 is a hedge formed for  $y_j^{ij}$  in  $\mathcal{H}$ . We show that the vertices  $W = W^* \cup Y^{ij*}$  form a hedge  
 786 for  $y_j^{ij}$  in  $\mathcal{H}$ . From Lemma 8,  $Anc_{\mathcal{H}[W^*]}(Y^*) = W^*$ , that is, all of the vertices in  $W^*$  are  
 787 ancestors of  $Y^*$  in  $\mathcal{H}[W^*]$ , and therefore in  $\mathcal{H}[W]$ . Also, the vertices  $y_{kl}^{ij}$  in  $Y^{ij*}$  have a  
 788 direct edge to their corresponding vertex in  $W^*$ , i.e.,  $y_{kl}^b$ , and therefore are ancestors of  
 789  $Y^*$  in  $\mathcal{H}[W]$  as well. Further, each vertex in  $Y^*$  such as  $y_k$  is a parent of  $y_k^{ij}$ , which is  
 790 in turn a parent of  $y_i^{ij}$  (or is  $y_i^{ij}$  itself if  $k = i$ .) Finally,  $y_i^{ij}$  has a directed edge to  $y_j^{ij}$  by  
 791 construction. As a result, all of the vertices  $W$  have a direct path to  $y_j^{ij}$  in  $\mathcal{H}[W]$ . That is,  
 792  $Anc_{\mathcal{H}[W]}(y_j^{ij}) = W$ . It now remains to show that  $W$  is a district in  $\mathcal{H}[W]$ . From Lemma 8,  
 793  $W^*$  is a district in  $\mathcal{H}[W^*]$ . As a result, the vertices  $W^*$  are connected through bidirected  
 794 edges in  $\mathcal{H}[W]$ . There is a bidirected edge between  $y_j$  and  $y_i^{ij}$  by construction of  $\mathcal{H}$ . It  
 795 suffices to show that for any  $v \in Y^{ij*}$ , there exists a bidirected path between  $v$  and  $y_i^{ij}$  in  
 796  $\mathcal{H}[W]$ . A vertex  $y_{kl}^{ij} \in Y^{ij*}$  (with double subscript, which are due to the bidirected edges  
 797 among  $Y^*$ ) has bidirected edges to  $y_k^{ij}$  and  $y_l^{ij}$ , which are both in  $Y^{ij*}$  by definition. Now  
 798 take an arbitrary vertex  $y_k^{ij} \in Y^{ij*}$  (with single subscript, due to vertices in  $Y^*$ ). We know  
 799  $y_k \in Y^*$ , as  $y_k^{ij} \in Y^{ij*}$ , by definition of  $Y^{ij*}$ .  $Y^*$  is a district in  $\mathcal{G}[Y^*]$ . That is, there exists  
 800 a bidirected path from  $y_k$  to  $y_i$  in  $\mathcal{G}[Y^*]$ . From Lemma 8 by taking  $W = Y^*$ , there is a  
 801 bidirected path  $p$  from  $y_k$  to  $y_i$  in  $\mathcal{H}[Y^* \cup \{y_{lm} | y_l, y_m \in Y^*\}]$ . By construction of  $\mathcal{H}$ , if we  
 802 replace each vertex  $v$  on  $p$  by  $v^{ij}$ , we achieve a bidirected path  $p'$  with vertices in  $Y^{ij*}$  from  
 803  $y_k^{ij}$  to  $y_i^{ij}$ , which completes the proof.

804

□

805 *Proof of Proposition 2.* The reduction from the edge ID problem to MCIP was shown through the  
 806 proof of Proposition 4. The opposite direction is an immediate corollary of Proposition 3. □

807 **Corollary 2.** *The edge ID problem and MCIP are equivalent.*

## 808 B Maximal Hedge

---

**Algorithm 3** Maximal Hedge.

---

```

1: function MH( $\mathcal{G}, Y$ )
2:   Initialize  $M \leftarrow \emptyset$ 
3:   for  $Y_i$  in districts of  $\mathcal{G}[Y]$  do
4:      $M \leftarrow M \cup \text{HHull}(\mathcal{G}, Y_i)$ 
5:   return  $\mathcal{G}[M]$ 


---


1: function HHULL( $\mathcal{G}, Y_i$ )
2:   Initialize  $H \leftarrow V^{\mathcal{G}}$ 
3:   while True do
4:      $C \leftarrow$  connected component (district) of  $Y_i$  via bidirected edges in  $\mathcal{G}[H]$ 
5:      $A \leftarrow$  ancestors of  $Y_i$  in  $\mathcal{G}[C]$ 
6:     if  $C \neq A$  then
7:        $H \leftarrow A$ 
8:     else
9:       break
10:  return  $H$ 

```

---

809 Herein, we present the algorithm for recovering the maximal hedge formed for  $Q[Y]$  in a given  
 810 ADMG  $\mathcal{G}$  (see Definition 5). Maximal hedge was initially defined in [1] under the name *hedge hull*.

$$z \xrightarrow{p} x \xrightarrow{q} y$$

Figure 5: An example where the expert is aware that there is no causal path from  $z$  to  $y$ , e.g., because  $z \perp\!\!\!\perp y$  with high confidence.

We adopt the same definition, and when  $\mathcal{G}[Y]$  comprises several districts, we define the maximal hedge as the union of the hedge hulls formed for each district of  $\mathcal{G}[Y]$ . As a result, the complete procedure of recovering the maximal hedge for a query  $Q[Y]$ , summarized in Algorithm 3, finds the maximal hedge formed for each district  $Y_i$  of  $\mathcal{G}[Y]$  and returns the union of them. This procedure is used as a subroutine **MH** in Algorithm 1. The function **HHull** is in fact Algorithm 1 borrowed from [1]. This function is proven to recover the union of all hedges formed for  $Y_i$ , where  $Y_i$  is one of the districts of  $\mathcal{G}[Y]$  (see Lemma 6 of [1]).

## C Generalizing Assumption 1

Lemma 1 states the equivalence of Problems 1 and 2 with the edge ID problem under Assumption 1. However, as mentioned in the main text, this equivalence holds in the more general setting where we allow for perfect negative correlations among edges. As an example, consider the graph of Figure 5. Suppose that the performed statistical independence tests show that the two variables  $z$  and  $y$  are independent of each other with high confidence. As a result, the expert believes that the edges  $(z, x)$  and  $(x, y)$  must not exist simultaneously, as otherwise the causal path from  $z$  to  $y$  would make them dependent. In such cases, the belief of the expert can be modeled as probabilities  $p$  and  $q$  assigned to the existence of the edges  $(z, x)$  and  $(x, y)$ , respectively, as well as a perfect negative correlation between them.

Note that the aforementioned constraint, i.e., that the edges do not exist simultaneously, can be specified for any number of edges, not limited to two edges only. For instance, the expert might believe at least one of the edges along a causal path of length  $n$  must not exist in the true ADMG describing the system. This belief can be modeled as an extra constraint in the optimization of Equations 2 and 3. We show that with the specification of such negative correlations, Problems 1 and 2 can still be cast as an instance of the edge ID problem. Therefore, the results presented in this work are valid in this setting as well.

**Assumption 2.** *The edges in  $\mathcal{G}$  are assigned probabilities  $p_e, \forall e \in \mathcal{G}$ , and perfect negative correlations are defined among subsets of edges. More precisely, for any subset  $E \subseteq E_d^{\mathcal{G}} \cup E_b^{\mathcal{G}}$ , there is either 1) no constraint (mutually independent), or 2) the constraint that at least one of the edges in  $E$  must not exist in the true ADMG (perfect negative correlation).*

**Proposition 5.** *Under Assumption 2, there exists a reduction from Problems 1 and 2 to the edge ID problem and vice versa with the time complexity in the order of  $O(|C| \cdot |V^{\mathcal{G}}| + |E_d^{\mathcal{G}} \cup E_b^{\mathcal{G}}|)$ , where  $C$  is the set of perfect correlation constraints.*

*Proof.* First note that we proved the equivalence of Problems 1 and 2 with the edge ID problem without the perfect correlation constraints in Lemma 1. As a result, under assumption 2, i.e., by adding the perfect correlation constraints, Problems 1 and 2 are equivalent to a modified edge ID problem with those constraints. But we claim that there exists an instance of the original unconstrained edge ID problem which is equivalent to these problems. To see this, first note that we know from Corollary 2 that the edge ID problem is equivalent to MCIP. Therefore, it suffices to show that there exists an instance of MCIP which is equivalent to the constrained edge ID mentioned above. To this end, consider the transform  $\mathcal{T}_2(\mathcal{G}, Y)$  introduced in Section A.2. This transformation maps an instance of the edge ID problem to an instance of MCIP. Applying this transformation to the constrained edge ID problem, we can map the constrained edge ID to an instance of MCIP with extra constraints, with transforming the constraints as well. That is, if for instance, there is a perfect negative correlation among the edges  $e_1, e_2$  in  $\mathcal{G}$ , this constraint is mapped to a negative perfect correlation on the corresponding vertices in  $\mathcal{H}$ , namely  $\mathcal{T}_2(e_1), \mathcal{T}_2(e_2)$ . In words, this constraint would be that at least one of  $\mathcal{T}_2(e_1)$  and  $\mathcal{T}_2(e_2)$  must be intervened upon. We show that such constraints can be integrated into the original definition of MCIP.

Suppose we have an MCIP problem in ADMG  $\mathcal{G}$  with query  $Q[Y]$ , with the extra constraint that at least one of the vertices  $X \subseteq V^{\mathcal{G}}$  must be intervened upon. Consider the example of  $X =$

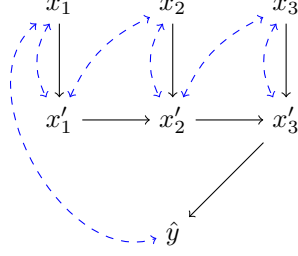

Figure 6: Integrating the perfect negative correlation constraint into MCIP.

859  $\{x_1, x_2, x_3\}$  in Figure 6. We build a new ADMG  $\mathcal{G}'$  by adding vertices  $\{x' | x \in X\}$ , i.e., a new vertex  
 860 corresponding to each vertex in  $X$ , along with an auxiliary vertex  $\hat{y}$  to  $\mathcal{G}$ . We fix a random ordering  
 861 over the vertices of  $X$ , and denote the set of vertices of  $X$  as  $x_1, \dots, x_m$ . We add the directed edges  
 862  $(x_i, x'_i)$  to  $\mathcal{G}'$ , as well as the bidirected edges  $\{x_i, x'_i\}$ . Further, we draw directed edges  $(x'_i, x'_{i+1})$  for  
 863 every  $1 \leq i < m$ . Finally, we draw the directed edge  $(x'_m, \hat{y})$  and the bidirected edge  $\{x_1, \hat{y}\}$ . Refer  
 864 to the graph in Figure 6 for an example with  $X = \{x_1, x_2, x_3\}$ . Note that the set  $X \cup X' \cup \{\hat{y}\}$  forms  
 865 a hedge for  $Q[\hat{y}]$ , where  $X' = \{x' | x \in X\}$ . Now it suffices to set the cost of intervention on vertices  
 866 of  $X'$  to infinity, and consider MCIP for the query  $Q[Y \cup \{\hat{y}\}]$  in  $\mathcal{G}'$ . It is straightforward to see that  
 867 the objective of this problem would be to find the minimum cost intervention for identification of  
 868  $Q[Y]$ , with the constraint that at least one of the vertices in  $X$  must be intervened on. Note that as  
 869 soon as one vertex in  $X$  gets intervened upon, there is no hedge left for  $Q[\hat{y}]$ . Also it is noteworthy  
 870 that adding this structure does not add any new hedges formed for  $Q[Y]$ , since the structure only  
 871 includes new descendants for  $X$  which have no directed paths to  $Y$ . Also note that the vertices  $X'$   
 872 and  $\hat{y}$  are specific to the very constraint corresponding to the set of vertices  $X$ . For any constraint, we  
 873 add such a structure to  $\mathcal{G}$ . The number of vertices (and therefore the time complexity) is at most in  
 874 the order  $\mathcal{O}(|C| \cdot |V^{\mathcal{G}}|)$ , where  $C$  is the set of constraints.

875

□

## 876 D Heuristic Algorithms

877 Algorithm 2 was devised considering the fact that every hedge formed for  $Q[Y]$  must include a vertex  
 878 that has a bidirected edge to  $Y$ . As mentioned in Section 4.2, an analogous approach, summarized in  
 879 Algorithm 4, uses the fact that any hedge formed for  $Q[Y]$  must include a parent of  $Y$ .

880 Let  $Y \subseteq V^{\mathcal{G}}$  be a set of vertices of  $\mathcal{G}$  such that  $\mathcal{G}[Y]$  comprises of only one district. Let  $Z := \{z \in$   
 881  $V^{\mathcal{G}} | \exists y \in Y : (z, y) \in E_d^{\mathcal{G}}\} \setminus Y$  denote the set of vertices that have at least one directed edge to a  
 882 vertex in  $Y$ , i.e., the parents of  $Y$  excluding  $Y$ . Any hedge formed for  $Q[Y]$  contains at least one  
 883 vertex of  $Z$ . As a result, in order to eliminate all the hedges formed for  $Q[Y]$ , it suffices to ensure that  
 884 none of the vertices in  $Z$  appear in the final hedge. To this end, for any  $z \in Z$ , it suffices to either  
 885 remove all the directed edges between  $z$  and  $Y$ , or eliminate all the bidirected paths from  $z$  to  $Y$ .  
 886 The problem of eliminating all bidirected paths from  $Z$  to  $Y$  can be cast as a minimum cut problem  
 887 between  $Z$  and  $Y$  in the edge-induced subgraph of  $\mathcal{G}$  over its bidirected edges. To add the possibility  
 888 of removing the directed edges between  $Z$  and  $Y$ , we add an auxiliary vertex  $z^*$  to the graph and  
 889 draw a bidirected edge between  $z^*$  and every  $z \in Z$  with weight  $w = \sum_{y \in Y} w_{(z, y)}$ , i.e., the sum of  
 890 the weights of all directed edges between  $z$  and  $Y$ . Note that  $z$  can have directed edges to multiple  
 891 vertices in  $Y$ . We then solve the minimum cut problem for  $z^*$  and  $Y$ . If an edge between  $z^*$  and  
 892  $z \in Z$  is in the solution to this min-cut problem, it translates to removing all the directed edges from  
 893  $z$  to  $Y$  in the original problem. Note that we can run the algorithm on the maximal hedge formed for  
 894  $Q[Y]$  in  $\mathcal{G}$  rather than  $\mathcal{G}$  itself.

## 895 E Experiments

896 Noting that the synthetic/simulation results in the main paper were for graphs with a  $\log(n)/n$  sparsity  
 897 constraint, we begin this section by providing a set of results on the simulated graphs without the

---

**Algorithm 4** Heuristic algorithm 2.

---

```

1: function HEID2( $\mathcal{G}, Y, W_{\mathcal{G}}$ )
2:    $\mathcal{G}' \leftarrow \mathbf{MH}(\mathcal{G}, Y)$ 
3:    $Z \leftarrow \{z \in V^{\mathcal{G}'} \mid \exists y \in Y : (z, y) \in E_d^{\mathcal{G}'}\} \setminus Y$ 
4:    $\mathcal{H} \leftarrow$  The induced subgraph of  $\mathcal{G}'$  on its bidirected edges.
5:    $W_{\mathcal{H}} \leftarrow \{w_e \in W_{\mathcal{G}} \mid e \in \mathcal{H}\}$ 
6:    $V^{\mathcal{H}} \leftarrow V^{\mathcal{H}} \cup \{y^*, z^*\}$ 
7:   for  $z \in Z$  do
8:      $E^{\mathcal{H}} \leftarrow E^{\mathcal{H}} \cup \{z^*, z\}$ 
9:      $W_{\mathcal{H}} \leftarrow W_{\mathcal{H}} \cup \{w_{\{z^*, z\}} = \sum_y w_{(z, y)}\}$ 
10:  for  $y \in Y$  do
11:     $E^{\mathcal{H}} \leftarrow E^{\mathcal{H}} \cup \{y, y^*\}$ 
12:     $W_{\mathcal{H}} \leftarrow W_{\mathcal{H}} \cup \{w_{\{y, y^*\}} = \infty\}$ 
13:   $E \leftarrow \text{MinCut}(\mathcal{H}, W_{\mathcal{H}}, z^*, y^*)$ 
14:  return  $(E, \sum_{e \in E} w_e)$ 

```

---

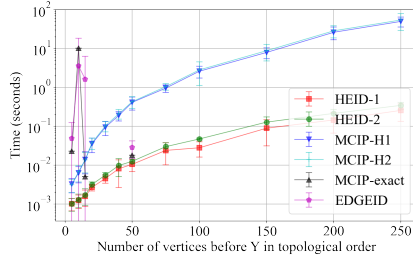

(a) Runtimes.

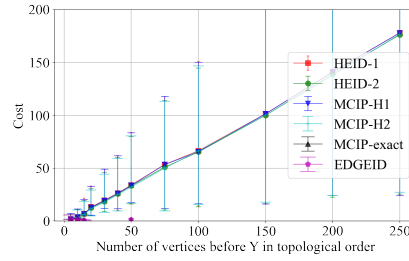

(b) Solution costs.

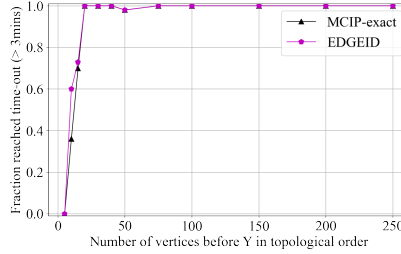

(c) Fraction for which runtime of 3 minutes exceeded.

Figure 7: Experimental results (for graphs generated without the sparsity constraint) for runtime, solution costs, fraction of graphs for which no solution was found, and fraction of graphs for which runtime limit of 3 minutes was exceeded. Error bars for runtime and cost graphs indicate 5th and 95th percentiles. Best viewed in color.

898 sparsity penalty for comparison. Then, we provide information about the causal discovery algorithm  
899 used to derive the psychology ‘Psych’ real-world graph.

## 900 E.1 Additional Simulation Results without Sparsity Constraint

901 The simulation results for graphs generated without the sparsity constraint are shown in Figure 7.  
902 These results illustrate monotonic increases in runtime and cost as the number of nodes increases. Our  
903 proposed heuristic algorithms (HEID-1 and HEID-2) maintain runtimes less than 0.5 seconds even  
904 for 250 nodes. In contrast, the two exact algorithms (MCIP-exact and EDGEID) exceed the three  
905 minute runtime limit at only 20 nodes, and the MCIP heuristic variants (MCIP-H1 and MCIP-H2)  
906 have runtimes which increase exponentially with the number of nodes. These results highlight the

907 efficiency of our proposed heuristic algorithms to find solutions with equivalent cost with significantly  
908 faster runtimes.

## 909 E.2 Psychology Graph Discovery

910 The settings for deriving the putative structure used on the psychology real-world graph are provided  
911 in Table 3.

Table 3: Hyperparameter settings for the Structural Agnostic Model used to generate the putative (directed) structure for the ‘Psych’ real-world dataset.

| Parameter          | Value |
|--------------------|-------|
| Learning Rate      | 0.01  |
| DAG Penalty        | True  |
| DAG Penalty Weight | 0.05  |
| Number of Runs     | 50    |
| Train Epochs       | 3000  |
| Test Epochs        | 800   |
| Mixed Data         | True  |
| hlayers            | 2     |
| dhlayers           | 2     |
| lambda1            | 10    |
| lambda2            | 0.001 |
| dlr                | 0.001 |
| linear             | False |
| nh                 | 20    |
| dnh                | 200   |
